# Supplementary material for: Machine Learning Approach for Analyzing 3-Year Outcomes of Patients with Brain Arteriovenous Malformation (AVM) after Stereotactic Radiosurgery (SRS)
Source: MDPI journal article supplement (doi:10.3390/diagnostics14010022), 2023-12-22
Supplement: s1 [file s1]

# Supplementary Material:

## Machine learning approach for analyzing 3-year outcomes of patients with brain arteriovenous malformation (AVM) after stereotactic radiosurgery (SRS)

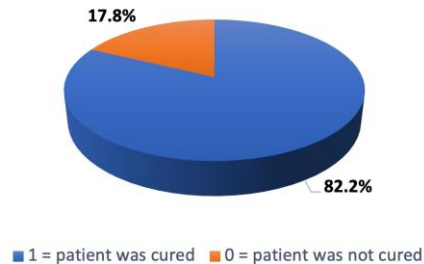

**Figure S1.** Distribution of cured variable.

**Table S1.** Sociodemographic characteristics of study population.

| Variable         | Value                                            | Number     | %            |
|------------------|--------------------------------------------------|------------|--------------|
| Gender           | Male                                             | 107        | 52.97        |
|                  | Female                                           | 95         | 47.03        |
| Age              | Child (1–11)                                     | 30         | 14.85        |
|                  | Teenager (12–17)                                 | 24         | 11.88        |
|                  | Young boy (18–29)                                | 66         | 32.37        |
|                  | Adult (30–59)                                    | 77         | 38.12        |
|                  | Older adult (60+)                                | 5          | 2.48         |
| Residence        | Lima or Callao in Perú                           | 163        | 80.69        |
|                  | Outside Lima or Callao in Perú                   | 37         | 18.32        |
|                  | Outside Perú                                     | 2          | 0.99         |
| Occupation       | Professional with bachelor's or technical degree | 35         | 17.33        |
|                  | General worker                                   | 24         | 11.88        |
|                  | Housewife                                        | 34         | 16.83        |
|                  | Police officer or similar                        | 9          | 4.46         |
|                  | Undergraduate student                            | 20         | 9.90         |
|                  | School student                                   | 56         | 27.72        |
|                  | Unemployed                                       | 10         | 4.95         |
|                  | Self-employed                                    | 14         | 6.93         |
| Education level  | Preschool                                        | 5          | 2.48         |
|                  | Primary school                                   | 33         | 16.34        |
|                  | Secondary school                                 | 107        | 52.97        |
|                  | Higher education                                 | 57         | 28.22        |
| Health insurance | Private                                          | 20         | 9.90         |
|                  | EsSalud                                          | 29         | 14.36        |
|                  | SIS                                              | 85         | 42.08        |
|                  | Personal                                         | 49         | 24.26        |
|                  | Military or similar                              | 19         | 9.41         |
| <b>Total</b>     |                                                  | <b>202</b> | <b>100.0</b> |

**Table S2.** Clinical and radiosurgery characteristics of study population.

| Variable              | Mean  | Std Dev | Min   | Median | Max |
|-----------------------|-------|---------|-------|--------|-----|
| Age                   | 27.63 | 14.90   | 4     | 25     | 68  |
| karnofsky_scale       | 82.78 | 9.37    | 40    | 80     | 100 |
| glasgow_coma_scale    | 14.80 | 0.46    | 12    | 15     | 15  |
| spetzler_martin_scale | 2.55  | 0.89    | 1     | 3      | 5   |
| buffalo_scale         | 2.43  | 0.98    | 0     | 2      | 5   |
| virginia_scale        | 2.08  | 0.82    | 0     | 2      | 4   |
| diameter_avm          | 2.14  | 0.89    | 0.5   | 2.1    | 6   |
| volume_avm            | 6.30  | 8.33    | 0.063 | 4      | 75  |
| num_afferent_vessels  | 2.51  | 0.92    | 1     | 2      | 6   |
| num_radiosurgeries    | 1.36  | 1.56    | 1     | 1      | 10  |
| num_isocenters        | 1.35  | 0.56    | 1     | 1      | 4   |
| radiation_doses       | 17.86 | 4.44    | 10    | 17     | 40  |
| isodosis              | 69.31 | 14.37   | 50    | 80     | 90  |
| cured                 | 22.07 | 6.47    | 6     | 24     | 36  |

**Table S3.** Angioarchitecture and treatment characteristics of study population.

| Variable                     | Frequency by category           | Values                                                                                 |
|------------------------------|---------------------------------|----------------------------------------------------------------------------------------|
| prev_cran_surgery            | 1: 31; 2: 171                   | 1 = yes; 0 = no                                                                        |
| embolization                 | 1: 49; 2: 153                   | 1 = yes; 0 = no                                                                        |
| embolization_agent           | 1: 26; 2: 24; 3: 152            | 1 = Onyx; 2 = Histoacryl; 3 = none                                                     |
| prev_surgery_or_embolization | 1: 22; 2: 40; 3: 9; 4: 131      | 1 = surgery; 2 = embolization; 3 = surgery and embolization; 4 = none                  |
| hemorrhage                   | 1: 155; 2: 47                   | 1 = yes; 2 = no                                                                        |
| hemorrhage_type              | 1: 91; 2: 13; 3: 29; 4: 69      | 1 = parenchymal; 2 = ventricular; 3 = parenchymal and ventricular; 4 = none            |
| headache                     | 1: 178; 2: 24                   | 1 = yes; 0 = no                                                                        |
| seizures                     | 1: 112; 2: 90                   | 1 = yes; 0 = no                                                                        |
| encephalomalacia             | 1: 76; 2: 126                   | 1 = yes; 0 = no                                                                        |
| deficit                      | 1: 53; 2: 26; 3: 32; 4: 91      | 1 = motor deficit; 2 = sensory deficit; 3 = cognitive deficit; 4 = no deficit observed |
| venous_aneurysm              | 1: 58; 2: 144                   | 1 = yes; 0 = no                                                                        |
| arterial_aneurysm            | 1: 3; 2: 199                    | 1 = yes; 0 = no                                                                        |
| dolichoectasia               | 1: 140; 2: 62                   | 1 = yes; 0 = no                                                                        |
| depth_avm                    | 1: 9; 2: 48; 3: 47; 4: 96; 5: 2 | 1 = cortical; 2 = subcortical; 3 = cortico-subcortical; 4 = deep; 5 = ventricular      |
| side_avm                     | 1: 85; 2: 100; 3: 17            | 1 = right; 2 = left; 3 = middle                                                        |
| expansion_shape_avm          | 1: 145; 2: 39; 3: 18            | 1 = compact; 2 = fuzzy; 3 = scattered mixed                                            |
| type_venous_drainage         | 1: 75; 2: 114; 3: 13            | 1 = superficial; 2 = deep; 3 = mixed                                                   |
| eloquence                    | 1: 63; 2: 139                   | 1 = yes; 0 = no                                                                        |
| blood_flow_velocity          | 1: 80; 2: 95; 3: 27             | 1 = slow; 2 = moderate; 3 = fast                                                       |
| venous_stenosis              | 1: 52; 2: 150                   | 1 = yes; 0 = no                                                                        |

**Table S4.** Locations of AVM in study population.

| <b>AVM location</b>      | <b>Number</b> | <b>%</b> |
|--------------------------|---------------|----------|
| Frontal lobe             | 20            | 9.90     |
| Temporal lobe            | 11            | 5.45     |
| Parietal lobe            | 11            | 5.45     |
| Occipital lobe           | 7             | 3.47     |
| Cerebral corpus callosum | 12            | 5.94     |
| Insular cortex           | 14            | 6.93     |
| Basal ganglia            | 34            | 16.83    |
| Cerebellum               | 13            | 6.44     |
| Ventricular              | 10            | 4.95     |
| Vermis                   | 3             | 1.49     |
| Frontomesial             | 6             | 2.97     |
| Frontoparietal           | 9             | 4.46     |
| Frontotemporal           | 3             | 1.49     |
| Mesencephalon            | 7             | 3.47     |
| Mesio-occipital          | 3             | 1.49     |
| Mesio-parietal           | 2             | 0.99     |
| Parieto-occipital        | 14            | 6.93     |
| Protuberance             | 3             | 1.49     |
| Mesio-temporal           | 14            | 6.93     |
| Temporo-occipital        | 3             | 1.49     |
| Temporo-parietal         | 1             | 0.49     |
| Brainstem                | 2             | 0.99     |
| Total                    | 202           | 100.0    |
